# Supplementary material for: Anionic G•U pairs in bacterial ribosomal rRNAs
Source: PubMed Central journal article supplement — RNA. 2023 Jul;29(7):1069–76. doi: 10.1261/rna.079583.123 (PMC10275268; doi:10.1261/rna.079583.123), 2023-07
Supplement: supp_079583.123_Supplemental_Figures.pdf [file supp_079583.123_Supplemental_Figures.pdf]

## Supplementary Figures

FIGURE S1

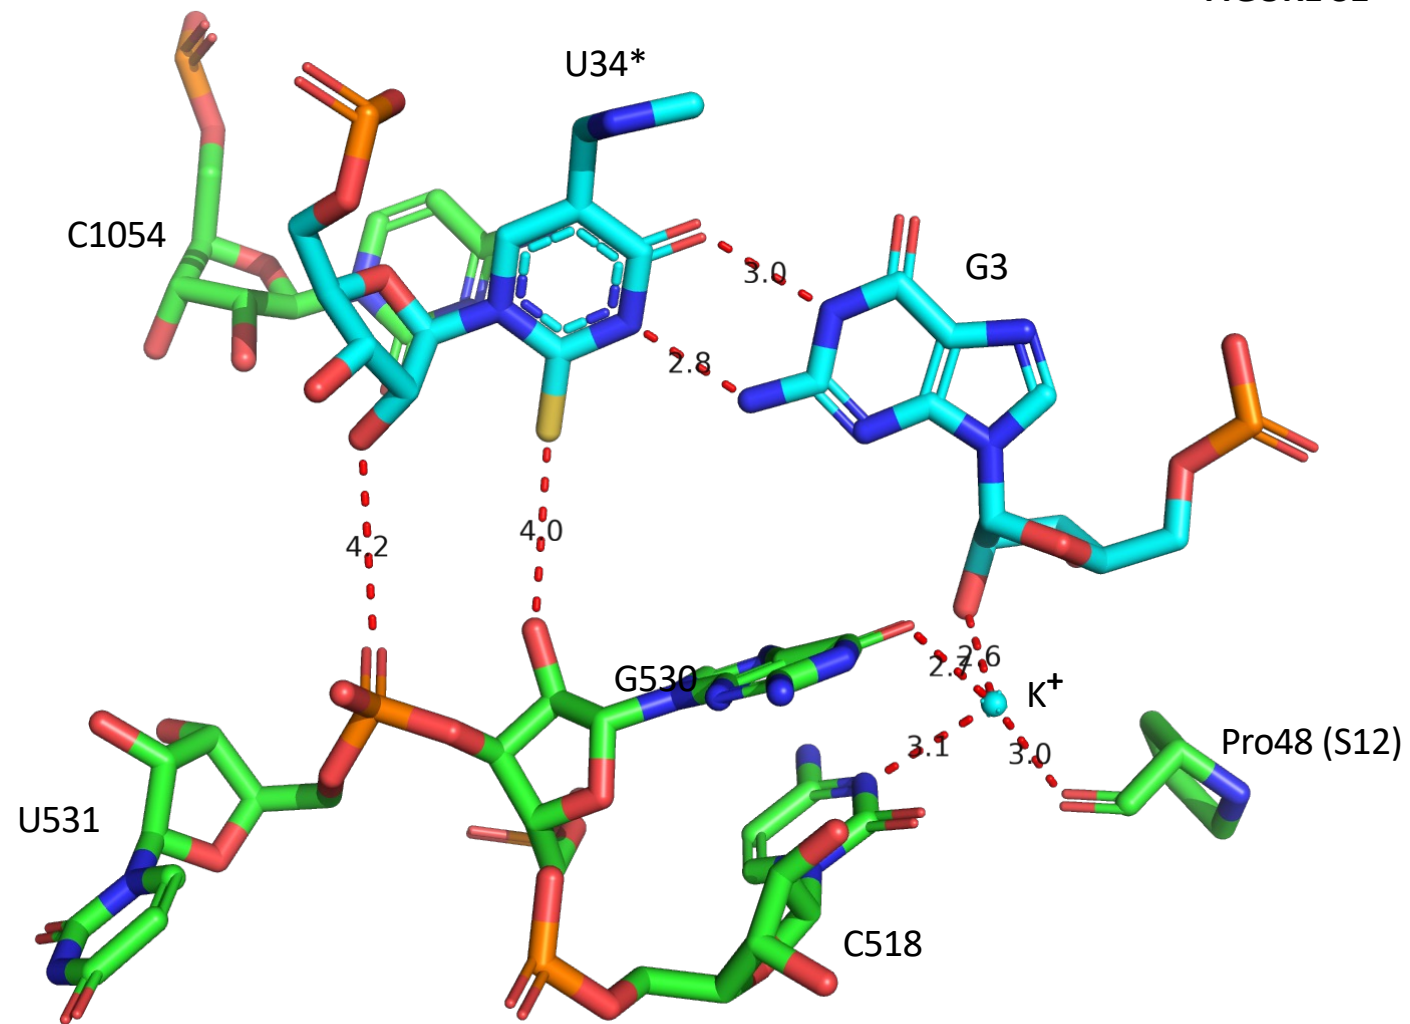

5E81

FIGURE S2 A

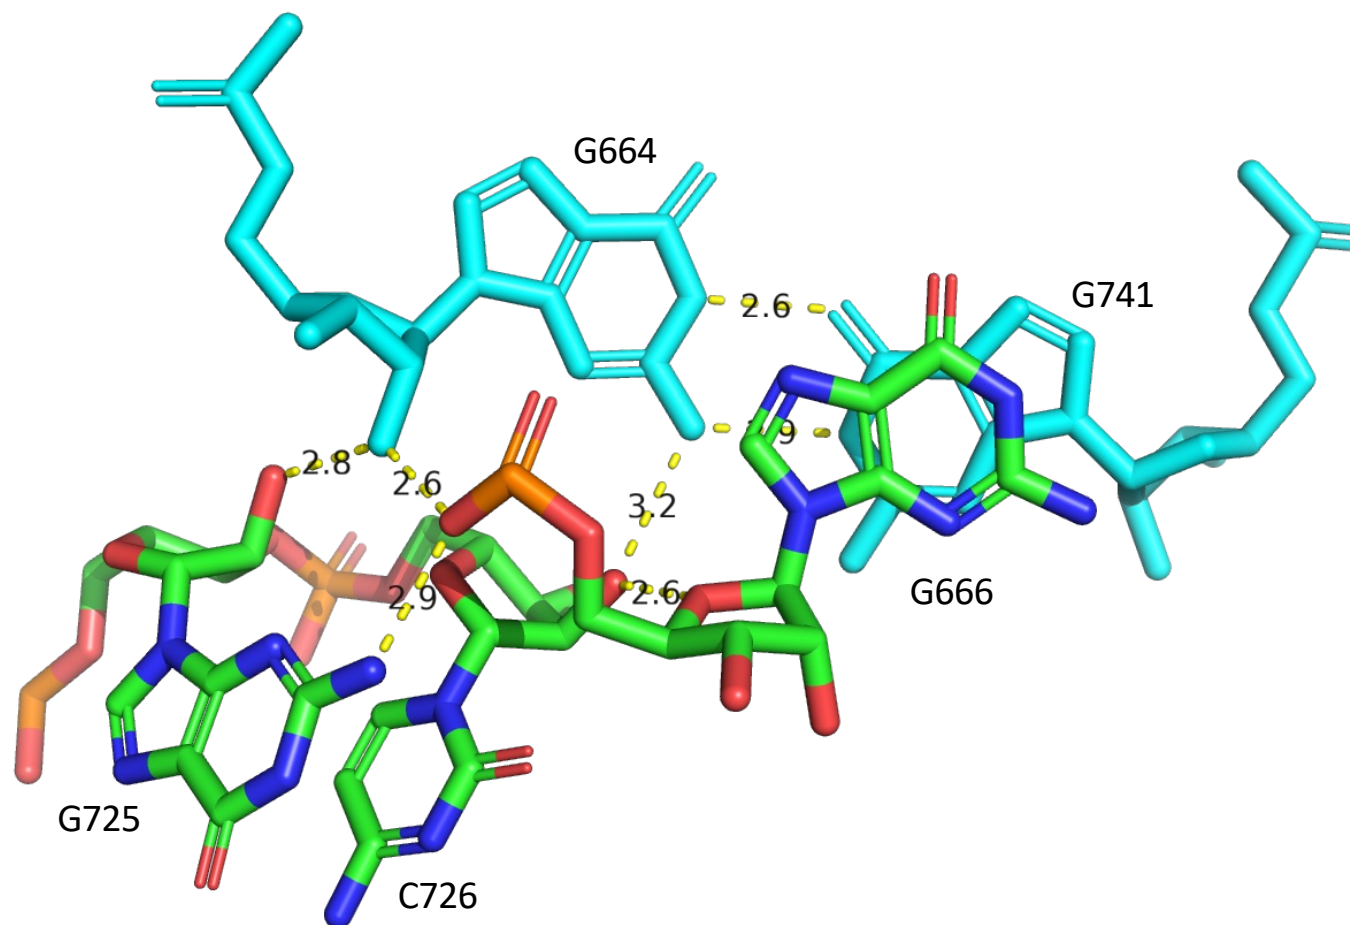

7K00

FIGURE S2 B

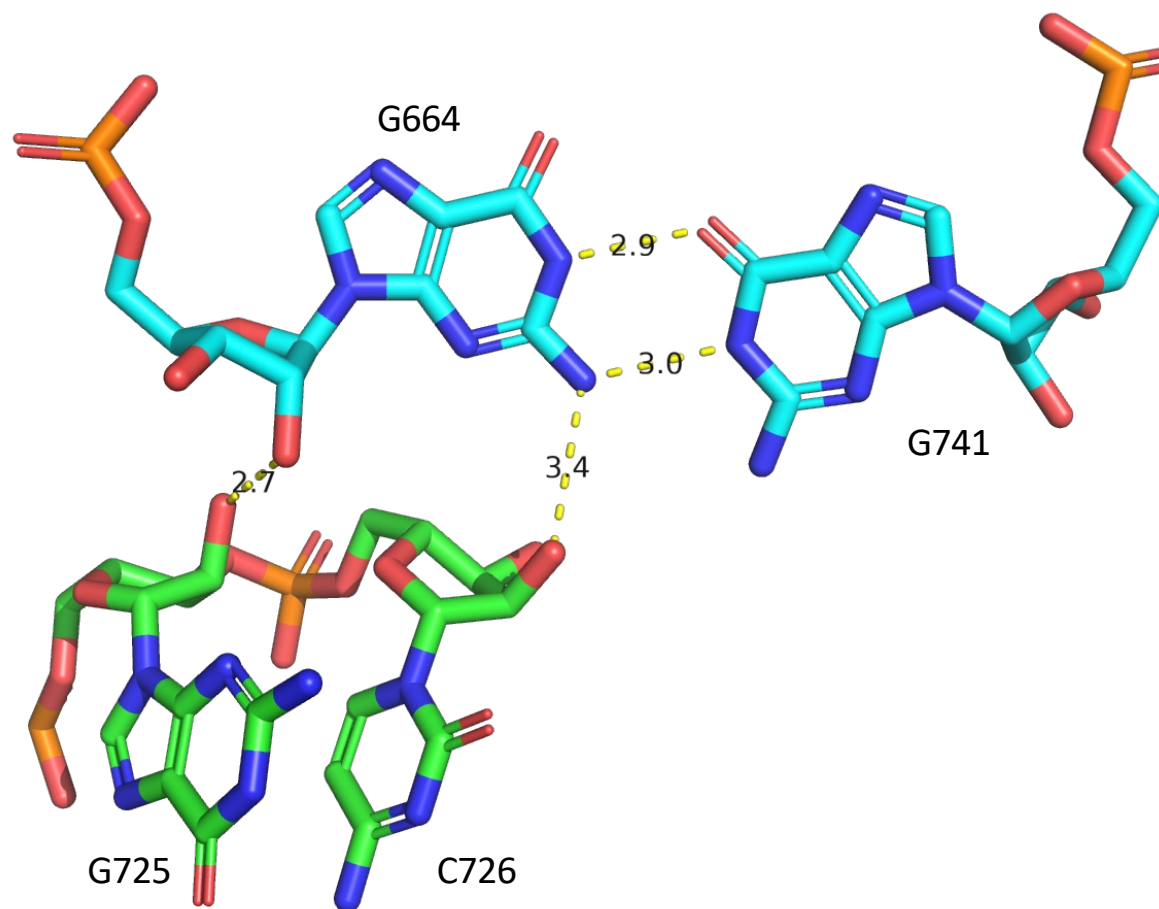

1G1X, S15 Complex

FIGURE S3

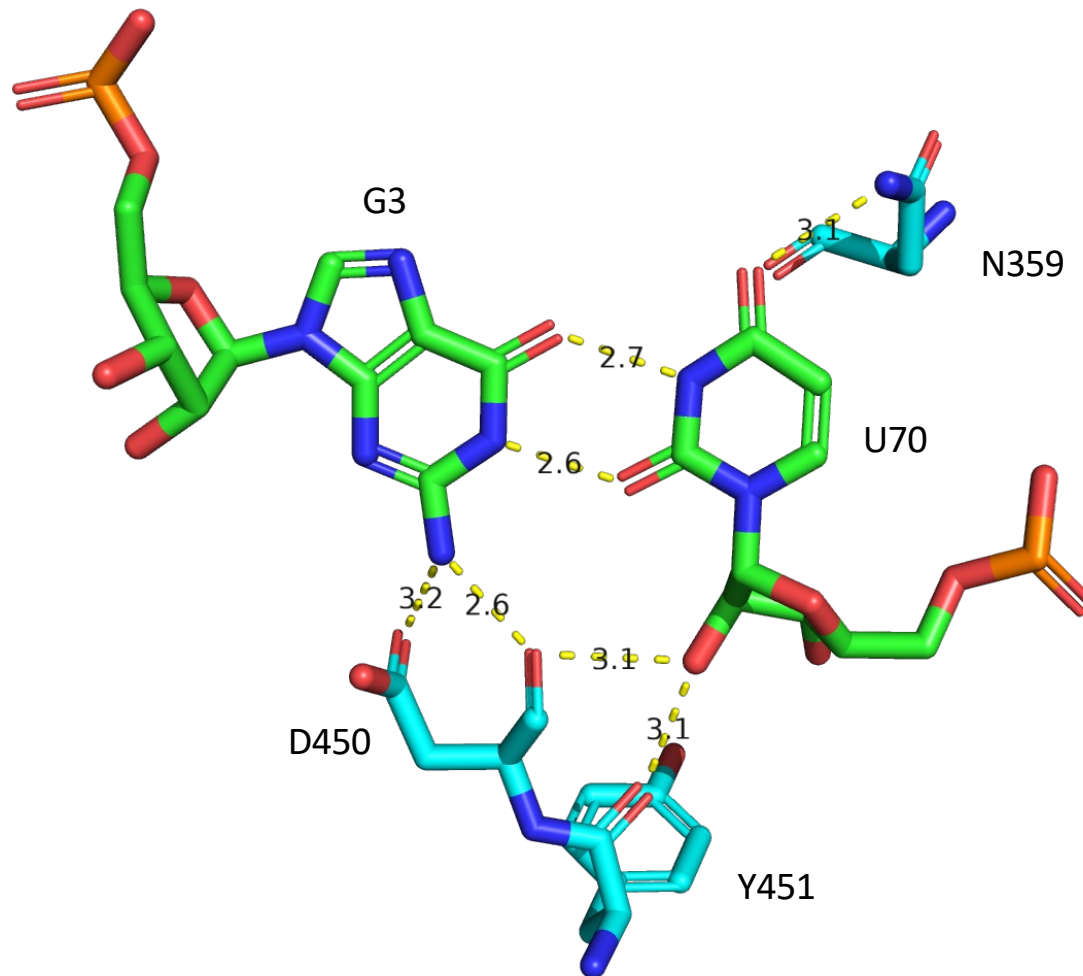

3WQY tRNA<sub>Ala</sub>/aaRS-Ala

FIGURE S4

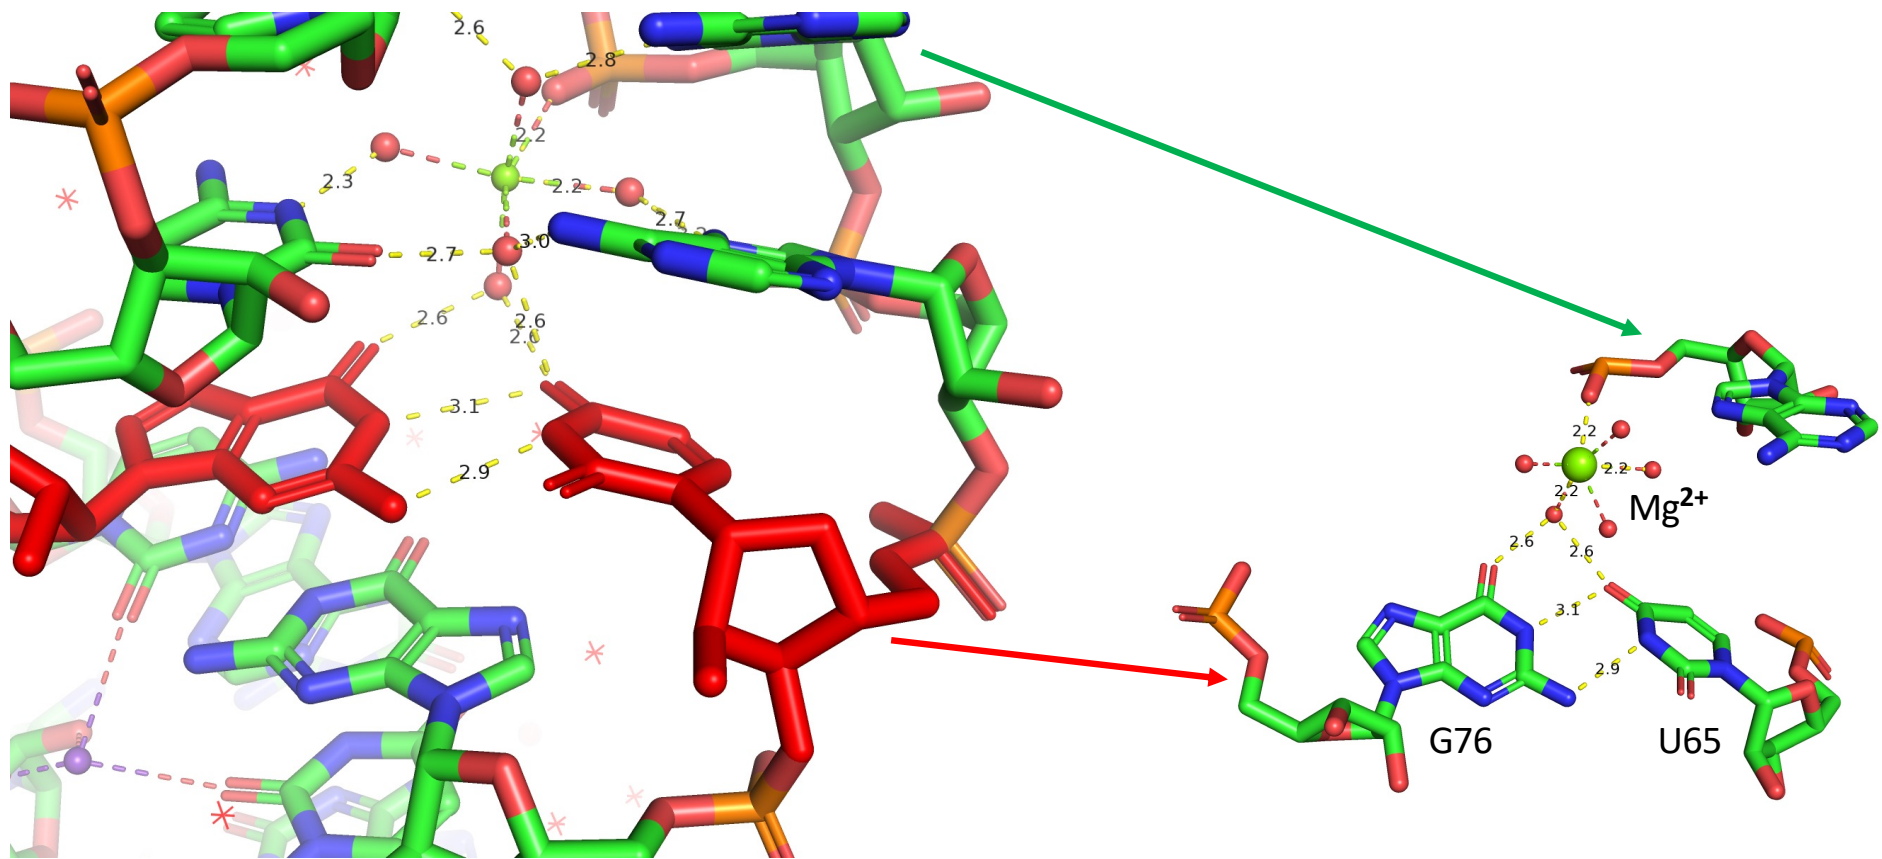

2QBZ
